# Supplementary material for: Epic Sepsis Model Inpatient Predictive Analytic Tool: A Validation Study
Source: PubMed Central journal article supplement — Crit Care Explor. 2023 Jun 30;5(7):e0941. doi: 10.1097/CCE.0000000000000941 (PMC10317482; doi:10.1097/cce.0000000000000941), 2023-06-30
Supplement: cc9-5-e0941-s001.pdf [file cc9-5-e0941-s001.pdf]

## Appendix A. ICD10 Diagnosis Codes

| ICD10 Diagnosis Code | Description                                                 |
|----------------------|-------------------------------------------------------------|
| R65.21               | Severe sepsis with septic shock                             |
| A02.1                | Salmonella sepsis                                           |
| A22.7                | Anthrax sepsis                                              |
| A26.7                | Erysipelothrix sepsis                                       |
| A32.7                | Listerial sepsis                                            |
| A40.0                | Sepsis due to streptococcus, group A                        |
| A40.1                | Sepsis due to streptococcus, group B                        |
| A40.3                | Sepsis due to Streptococcus pneumoniae                      |
| A40.8                | Other streptococcal sepsis                                  |
| A40.9                | Streptococcal sepsis, unspecified                           |
| A41.01               | Sepsis due to Methicillin susceptible Staphylococcus aureus |
| A41.02               | Sepsis due to Methicillin resistant Staphylococcus aureus   |
| A41.1                | Sepsis due to other specified staphylococcus                |
| A41.2                | Sepsis due to unspecified staphylococcus                    |
| A41.3                | Sepsis due to Hemophilus influenzae                         |
| A41.4                | Sepsis due to anaerobes                                     |
| A41.50               | Gram-negative sepsis, unspecified                           |
| A41.51               | Sepsis due to Escherichia coli [E. coli]                    |
| A41.52               | Sepsis due to Pseudomonas                                   |
| A41.53               | Sepsis due to Serratia                                      |
| A41.81               | Sepsis due to Enterococcus                                  |
| A41.89               | Other specified sepsis                                      |
| A41.9                | Sepsis, unspecified organism                                |

|        |                                    |
|--------|------------------------------------|
| A42.7  | Actinomycotic sepsis               |
| A54.86 | Gonococcal sepsis                  |
| B37.7  | Candidal sepsis                    |
| R65.20 | Severe sepsis without septic shock |

STROBE Statement—checklist of items that should be included in reports of observational studies

|                           | Item No. | Recommendation                                                                                                                                                                                                                                                                                                                                                                                                                                                         | Page No. | Relevant text from manuscript                                 |
|---------------------------|----------|------------------------------------------------------------------------------------------------------------------------------------------------------------------------------------------------------------------------------------------------------------------------------------------------------------------------------------------------------------------------------------------------------------------------------------------------------------------------|----------|---------------------------------------------------------------|
| <b>Title and abstract</b> | 1        | (a) Indicate the study's design with a commonly used term in the title or the abstract                                                                                                                                                                                                                                                                                                                                                                                 | 2        | Retrospective cohort study as stated in the Abstract (page 3) |
|                           |          | (b) Provide in the abstract an informative and balanced summary of what was done and what was found                                                                                                                                                                                                                                                                                                                                                                    |          | Provided in Abstract on page 3                                |
| <b>Introduction</b>       |          |                                                                                                                                                                                                                                                                                                                                                                                                                                                                        |          |                                                               |
| Background/rationale      | 2        | Explain the scientific background and rationale for the investigation being reported                                                                                                                                                                                                                                                                                                                                                                                   |          | Included in the Introduction on page 7-8.                     |
| Objectives                | 3        | State specific objectives, including any prespecified hypotheses                                                                                                                                                                                                                                                                                                                                                                                                       |          | Included in the Introduction on page 7-8.                     |
| <b>Methods</b>            |          |                                                                                                                                                                                                                                                                                                                                                                                                                                                                        |          |                                                               |
| Study design              | 4        | Present key elements of study design early in the paper                                                                                                                                                                                                                                                                                                                                                                                                                |          | Included in the Materials and Methods on page 8-9             |
| Setting                   | 5        | Describe the setting, locations, and relevant dates, including periods of recruitment, exposure, follow-up, and data collection                                                                                                                                                                                                                                                                                                                                        |          | Included in the Materials and Methods on pages 8-9            |
| Participants              | 6        | (a) <i>Cohort study</i> —Give the eligibility criteria, and the sources and methods of selection of participants. Describe methods of follow-up<br><i>Case-control study</i> —Give the eligibility criteria, and the sources and methods of case ascertainment and control selection. Give the rationale for the choice of cases and controls<br><i>Cross-sectional study</i> —Give the eligibility criteria, and the sources and methods of selection of participants |          | Included in the Materials and Methods on pages 8-9            |
|                           |          | (b) <i>Cohort study</i> —For matched studies, give matching criteria and number of exposed and unexposed<br><i>Case-control study</i> —For matched studies, give matching criteria and the number of controls per case                                                                                                                                                                                                                                                 |          | Included in the Materials and Methods on pages 8-9            |
| Variables                 | 7        | Clearly define all outcomes, exposures, predictors, potential confounders, and effect modifiers. Give diagnostic criteria, if applicable                                                                                                                                                                                                                                                                                                                               |          | Included in the Materials and Methods on pages 8-9            |

|                              |    |                                                                                                                                                                                      |                                                    |
|------------------------------|----|--------------------------------------------------------------------------------------------------------------------------------------------------------------------------------------|----------------------------------------------------|
| Data sources/<br>measurement | 8* | For each variable of interest, give sources of data and details of methods of assessment (measurement). Describe comparability of assessment methods if there is more than one group | Included in the Materials and Methods on pages 8-9 |
| Bias                         | 9  | Describe any efforts to address potential sources of bias                                                                                                                            | Included in the Materials and Methods on pages 8-9 |
| Study size                   | 10 | Explain how the study size was arrived at                                                                                                                                            | Included in the Materials and Methods on pages 8-9 |

Continued on next page

|                        |     |                                                                                                                                                                                                                                                                                                           |                                                    |
|------------------------|-----|-----------------------------------------------------------------------------------------------------------------------------------------------------------------------------------------------------------------------------------------------------------------------------------------------------------|----------------------------------------------------|
| Quantitative variables | 11  | Explain how quantitative variables were handled in the analyses. If applicable, describe which groupings were chosen and why                                                                                                                                                                              | Included in the Materials and Methods on pages 8-9 |
| Statistical methods    | 12  | (a) Describe all statistical methods, including those used to control for confounding                                                                                                                                                                                                                     | Included in the Materials and Methods on pages 8-9 |
|                        |     | (b) Describe any methods used to examine subgroups and interactions                                                                                                                                                                                                                                       | Included in the Materials and Methods on pages 8-9 |
|                        |     | (c) Explain how missing data were addressed                                                                                                                                                                                                                                                               | Included in the Materials and Methods on pages 8-9 |
|                        |     | (d) <i>Cohort study</i> —If applicable, explain how loss to follow-up was addressed<br><i>Case-control study</i> —If applicable, explain how matching of cases and controls was addressed<br><i>Cross-sectional study</i> —If applicable, describe analytical methods taking account of sampling strategy | Not applicable.                                    |
|                        |     | (e) Describe any sensitivity analyses                                                                                                                                                                                                                                                                     | Not applicable.                                    |
| <b>Results</b>         |     |                                                                                                                                                                                                                                                                                                           |                                                    |
| Participants           | 13* | (a) Report numbers of individuals at each stage of study—eg numbers potentially eligible, examined for eligibility, confirmed eligible, included in the study, completing follow-up, and analysed                                                                                                         | Included in the Results on pages 10 and 11.        |
|                        |     | (b) Give reasons for non-participation at each stage                                                                                                                                                                                                                                                      | Not applicable                                     |
|                        |     | (c) Consider use of a flow diagram                                                                                                                                                                                                                                                                        | Not required                                       |
| Descriptive data       | 14* | (a) Give characteristics of study participants (eg demographic, clinical, social) and information on exposures and potential confounders                                                                                                                                                                  | Included in the Results on pages 10 and 11.        |
|                        |     | (b) Indicate number of participants with missing data for each variable of interest                                                                                                                                                                                                                       | Included in the Results on pages 10 and 11.        |
|                        |     | (c) <i>Cohort study</i> —Summarise follow-up time (eg, average and total amount)                                                                                                                                                                                                                          | Included in the Results on pages 10 and 11.        |
| Outcome data           | 15* | <i>Cohort study</i> —Report numbers of outcome events or summary measures over time                                                                                                                                                                                                                       | Included in the Results on pages 10 and 11.        |
|                        |     | <i>Case-control study</i> —Report numbers in each exposure category, or summary measures of exposure                                                                                                                                                                                                      |                                                    |
|                        |     | <i>Cross-sectional study</i> —Report numbers of outcome events or summary measures                                                                                                                                                                                                                        |                                                    |
| Main results           | 16  | (a) Give unadjusted estimates and, if applicable, confounder-adjusted estimates and their precision (eg, 95% confidence interval). Make clear which confounders were adjusted for and why they were included                                                                                              | Included in the Results on pages 10 and 11.        |

---

|                                                                                                                  |                                             |
|------------------------------------------------------------------------------------------------------------------|---------------------------------------------|
| (b) Report category boundaries when continuous variables were categorized                                        | Included in the Results on pages 10 and 11. |
| (c) If relevant, consider translating estimates of relative risk into absolute risk for a meaningful time period | Not applicable                              |

---

Continued on next page

|                          |    |                                                                                                                                                                            |                                             |
|--------------------------|----|----------------------------------------------------------------------------------------------------------------------------------------------------------------------------|---------------------------------------------|
| Other analyses           | 17 | Report other analyses done—eg analyses of subgroups and interactions, and sensitivity analyses                                                                             | Included in the Results on pages 10 and 11. |
| <b>Discussion</b>        |    |                                                                                                                                                                            |                                             |
| Key results              | 18 | Summarise key results with reference to study objectives                                                                                                                   | Included in the Discussion on page 11-14    |
| Limitations              | 19 | Discuss limitations of the study, taking into account sources of potential bias or imprecision. Discuss both direction and magnitude of any potential bias                 | Included in the Discussion on page 11-14    |
| Interpretation           | 20 | Give a cautious overall interpretation of results considering objectives, limitations, multiplicity of analyses, results from similar studies, and other relevant evidence | Included in the Discussion on page 11-14    |
| Generalisability         | 21 | Discuss the generalisability (external validity) of the study results                                                                                                      | Included in the Discussion on page 11-14    |
| <b>Other information</b> |    |                                                                                                                                                                            |                                             |
| Funding                  | 22 | Give the source of funding and the role of the funders for the present study and, if applicable, for the original study on which the present article is based              | Not applicable                              |

\*Give information separately for cases and controls in case-control studies and, if applicable, for exposed and unexposed groups in cohort and cross-sectional studies.

**Note:** An Explanation and Elaboration article discusses each checklist item and gives methodological background and published examples of transparent reporting. The STROBE checklist is best used in conjunction with this article (freely available on the Web sites of PLoS Medicine at <http://www.plosmedicine.org/>, Annals of Internal Medicine at <http://www.annals.org/>, and Epidemiology at <http://www.epidem.com/>). Information on the STROBE Initiative is available at [www.strobe-statement.org](http://www.strobe-statement.org).
