# Supplementary figures and images for: Epic Sepsis Model Inpatient Predictive Analytic Tool: A Validation Study
Source: PubMed Central journal article supplement — Crit Care Explor. 2023 Jun 30;5(7):e0941. doi: 10.1097/CCE.0000000000000941 (PMC10317482; doi:10.1097/cce.0000000000000941), 2023-06-30

# ROC Curve

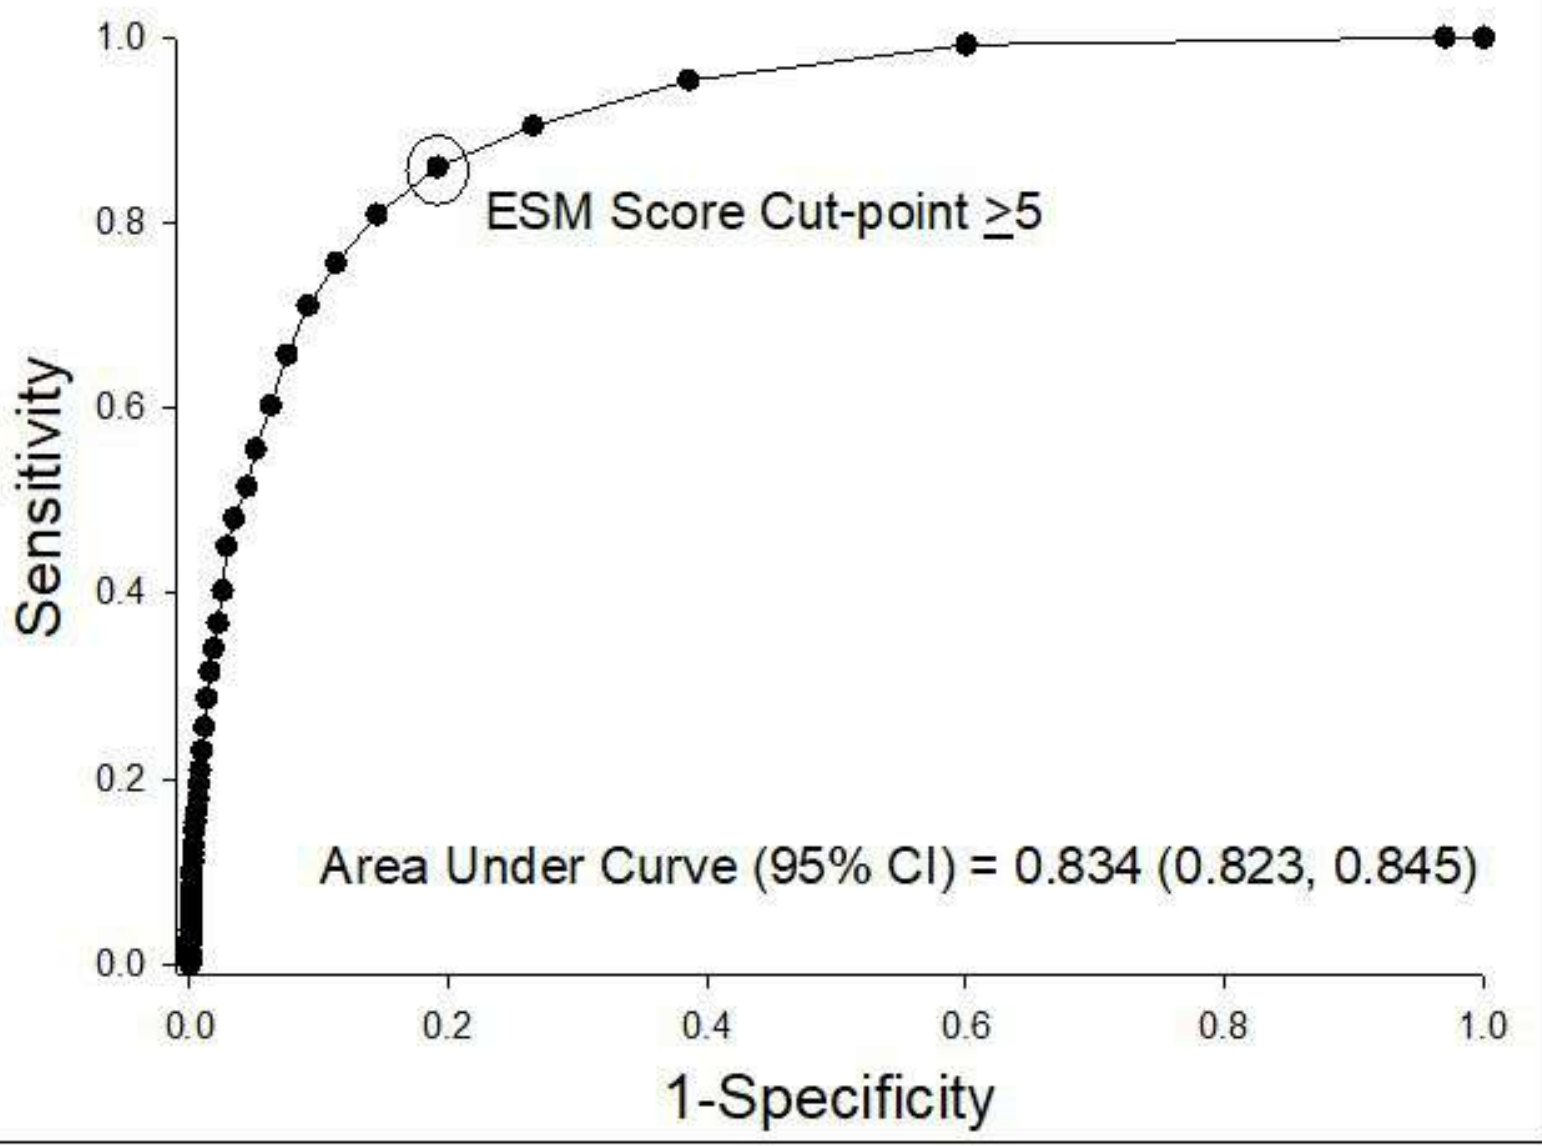

Supplement: cc9-5-e0941-s002.pdf [file cc9-5-e0941-s002.pdf]
